# Supplementary material
Source: Springer Nature journal article supplement (https://www.springermedizin.de/resource/supplementary/12985_2010_1008_MOESM11_ESM.pdf/9608936)

### A time dependent infection scoring

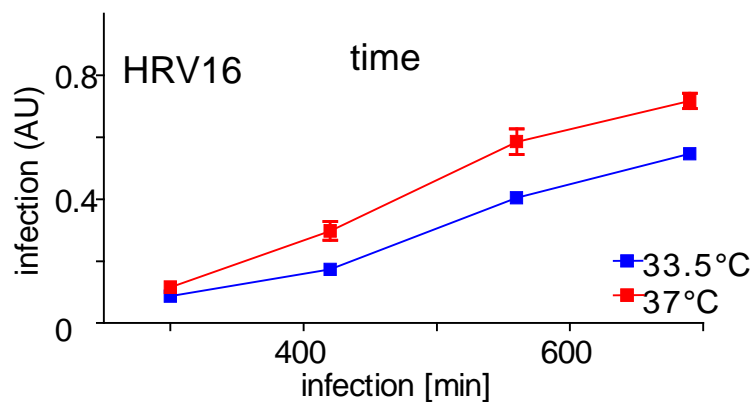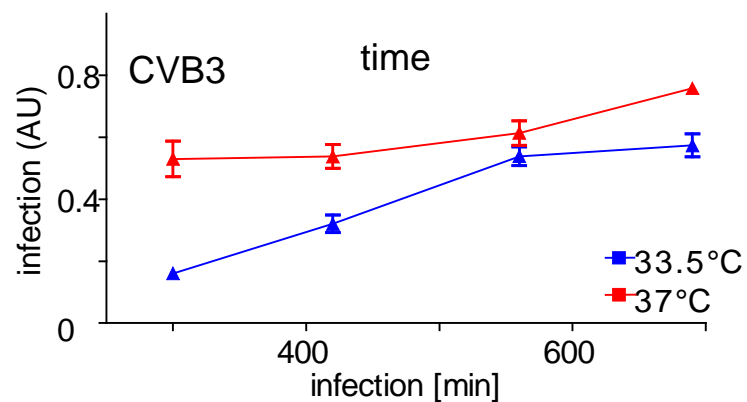

### B dose dependent infection scoring

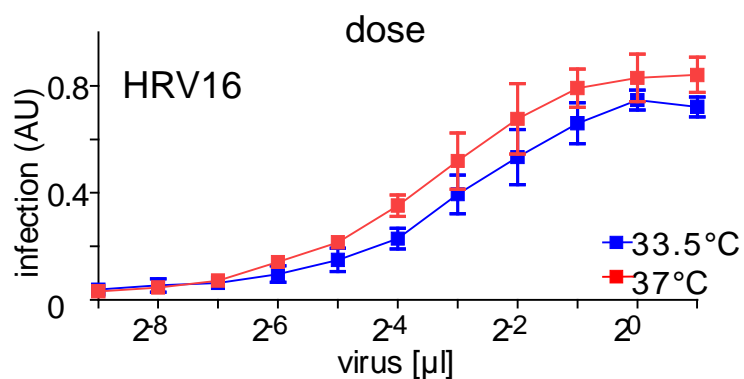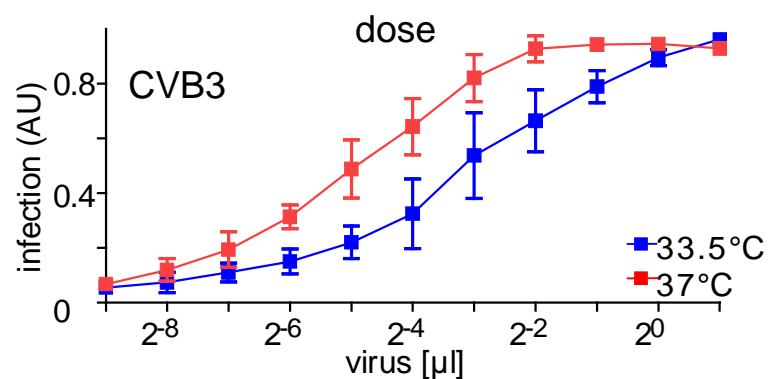

### C single cycle growth curve

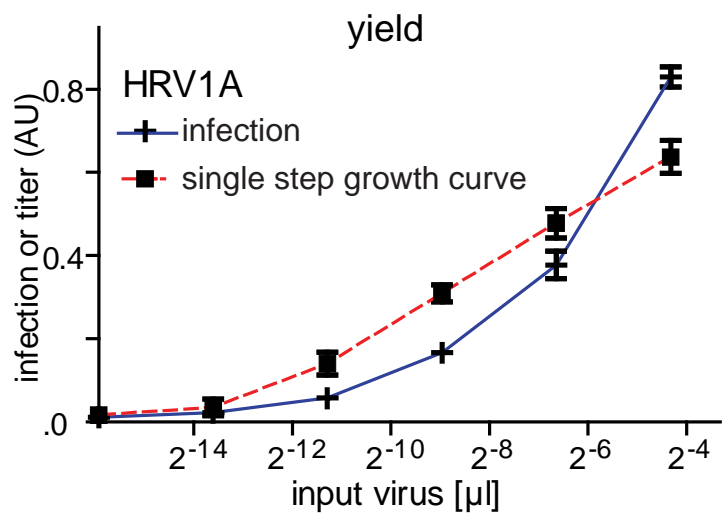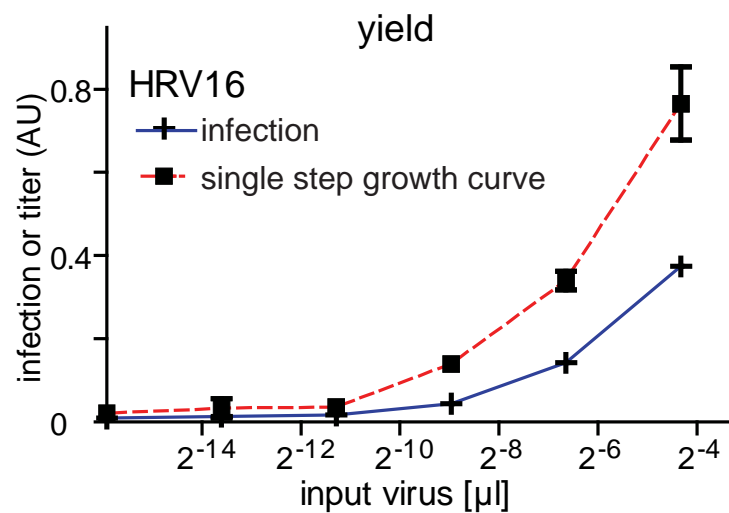

Supplement: MOESM11 [file 9608936]
